# Supplementary material for: Intake of sucrose-sweetened beverages and risk of developing pharmacologically treated hypertension in women: cohort study
Source: HighWire-hosted journal article supplement (doi:10.1136/bmjnph-2022-000426), 2022-11-09
Supplement: bmjnph-2022-000426supp001_data_supplement.pdf [file bmjnph-2022-000426supp001_data_supplement.pdf]

Supplemental Table 1: The risk of incident hypertension within 10 years following delivery by servings per day of sucrose-sweetened beverages: MoBa Cohort Study (N= 60,027)

| Entire cohort<br>Servings of<br>SSB <sup>1</sup> | Participants<br>N | Cases<br>n | Model 1 <sup>2</sup><br>HR (95% CI) | Model 2 <sup>3</sup><br>HR (95% CI) | Model 3 <sup>4</sup><br>HR (95% CI) |
|--------------------------------------------------|-------------------|------------|-------------------------------------|-------------------------------------|-------------------------------------|
| <1                                               | 51,143            | 1,179      | Referent                            | Referent                            | Referent                            |
| <b>1-1.49</b>                                    | 3728              | 122        | 1.40 (1.16, 1.69)                   | 1.37 (1.13, 1.67)                   | 1.34 (1.11, 1.64)                   |
| <b>≥ 1.50</b>                                    | 5156              | 179        | 1.55 (1.31, 1.82)                   | 1.29 (1.09, 1.53)                   | 1.23 (1.03, 1.48)                   |

Abbreviations: CI, confidence interval; HR, hazard ratio; SSB, sugar-sweetened beverages.

1. One serving =250ml
2. Maternal age at delivery (years), total energy intake (kcal/day) evaluated in Cox proportional hazards analyses.
3. Maternal age at delivery (years), total energy intake (kcal/day), body mass index (kg/m<sup>2</sup>), daily smoking prior to pregnancy, parity, diabetes mellitus (prior or during pregnancy or type unspecified), gestational hypertension (with or without proteinuria), preterm delivery (<37 weeks gestation) and physical activity (≥3 hrs, <3 hrs per/week, missing).
4. Model 2 covariates plus intake of dietary fiber (g/day) and added sugar from food as percent energy.
